# Supplementary material for: Discovery of N-cyclobutylaminoethoxyisoxazole derivatives as novel sigma-1 receptor ligands with neurite outgrowth efficacy in cells
Source: Royal Society of Chemistry journal article supplement (doi:10.1039/c8ra00072g), 2018-01-01

# Supplementary Information

## Discovery of N-Cyclobutylaminoethoxyisoxazole Derivatives as Novel Sigma-1

### Receptor Ligands with Neurite Outgrowth Efficacy in Cells

Hao Sun <sup>a, +</sup>, Yun-Jie Wang <sup>b, +</sup>, Wen-Wen Shi <sup>a, +</sup>, Fan Yang <sup>a</sup>, Jie Tang <sup>a</sup>, Tao Pang <sup>b, \*</sup>, Li-Fang Yu <sup>a, \*</sup>.

\*Corresponding authors

<sup>a</sup>Shanghai Engineering Research Center of Molecular Therapeutics and New Drug Development, School of Chemistry and Molecular Engineering, East China Normal University, 3663 North Zhongshan Road, Shanghai 200062, China

E-mail: lfyu@sat.ecnu.edu.cn; Tel.: +86-21-62231385

<sup>b</sup>Jiangsu Key Laboratory of Drug Screening, State Key Laboratory of Natural Medicines, China Pharmaceutical University, Nanjing 210009, PR China

E-mail: tpang@cpu.edu.cn; Tel.: +86-25-83271043

<sup>+</sup>These authors contributed equally

## Contents

<sup>1</sup>H and <sup>13</sup>C NMR spectra of all final compounds

# <sup>1</sup>H NMR and <sup>13</sup>C NMR spectra of compound **17**

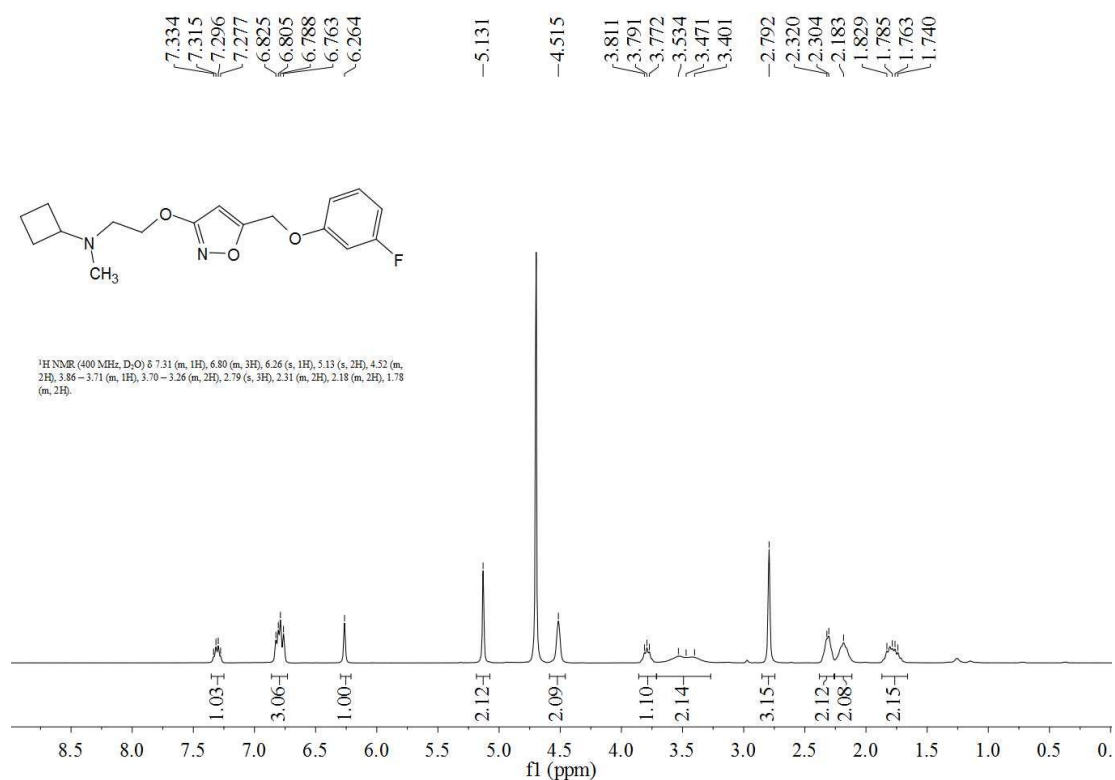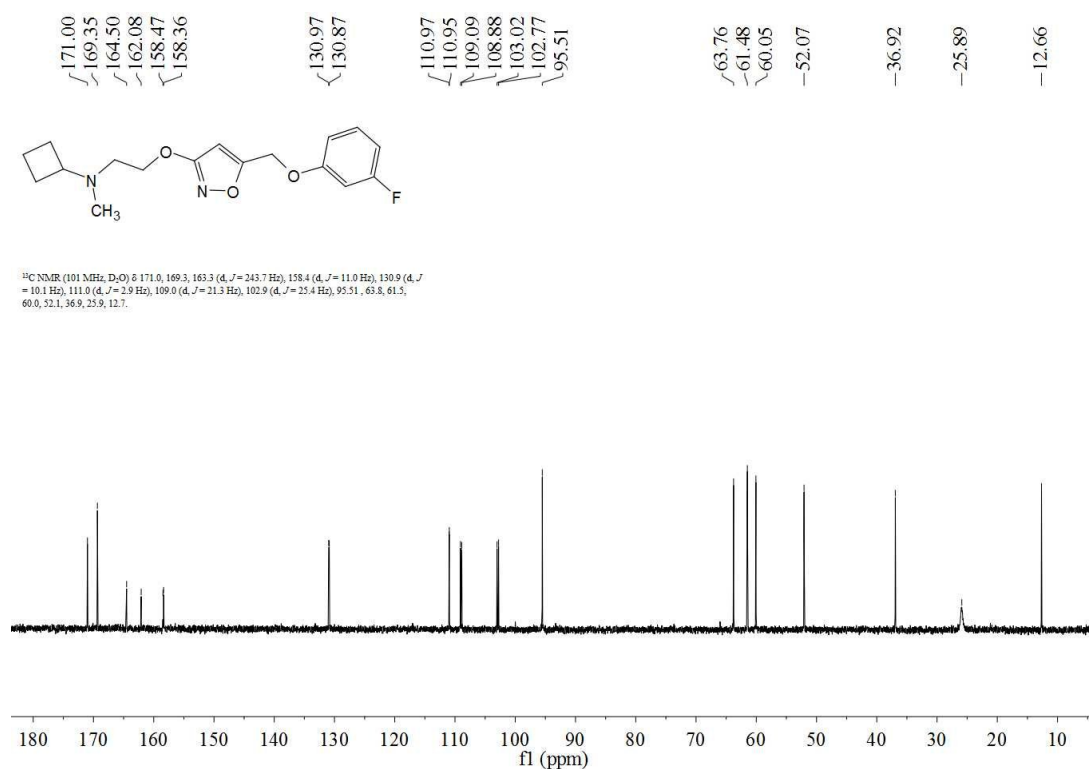

# <sup>1</sup>H NMR and <sup>13</sup>C NMR spectra of compound **18**

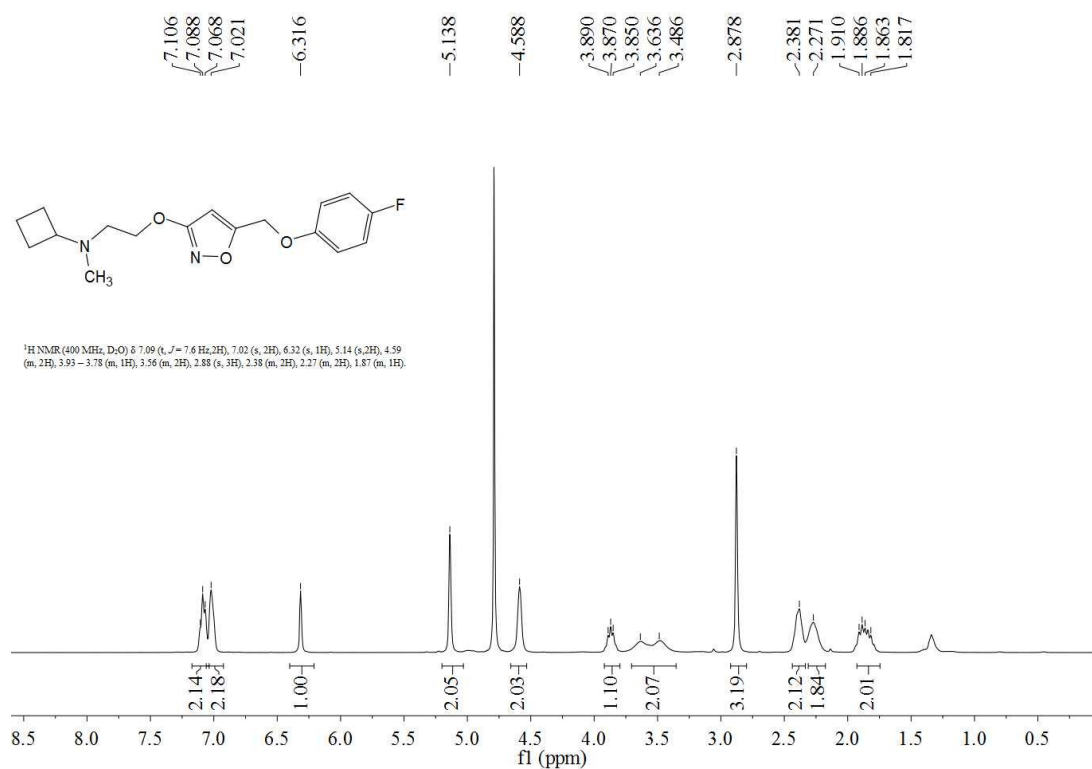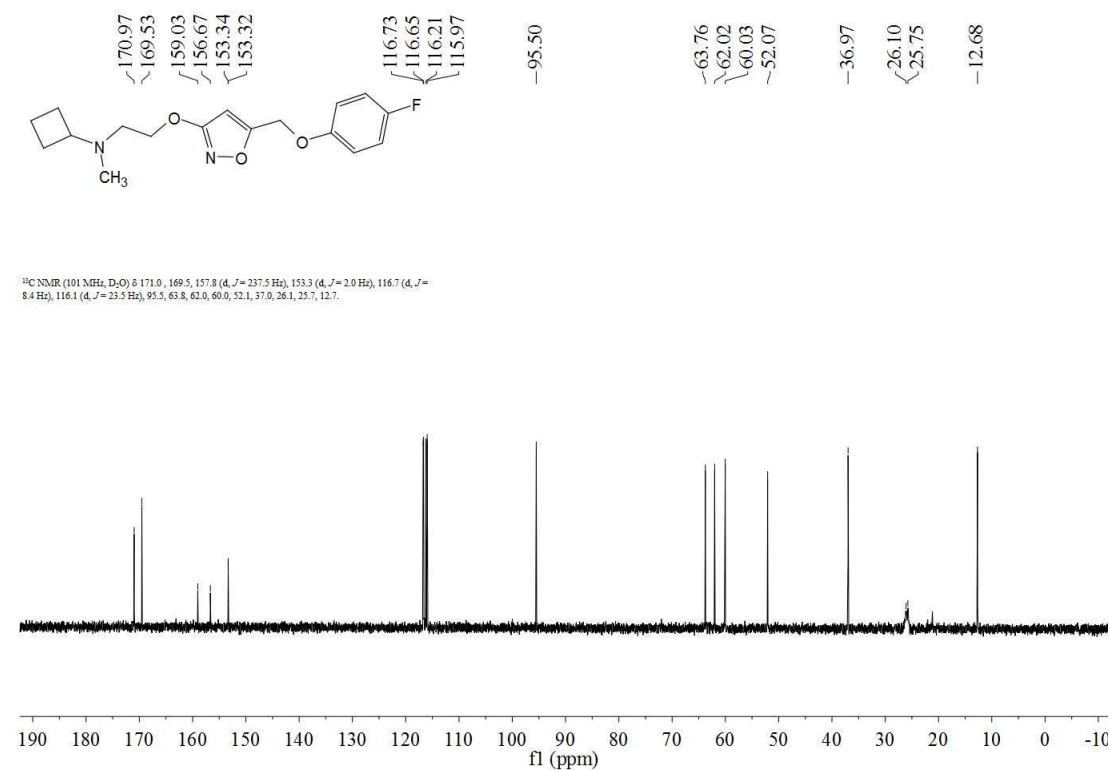

# <sup>1</sup>H NMR and <sup>13</sup>C NMR spectra of compound **19**

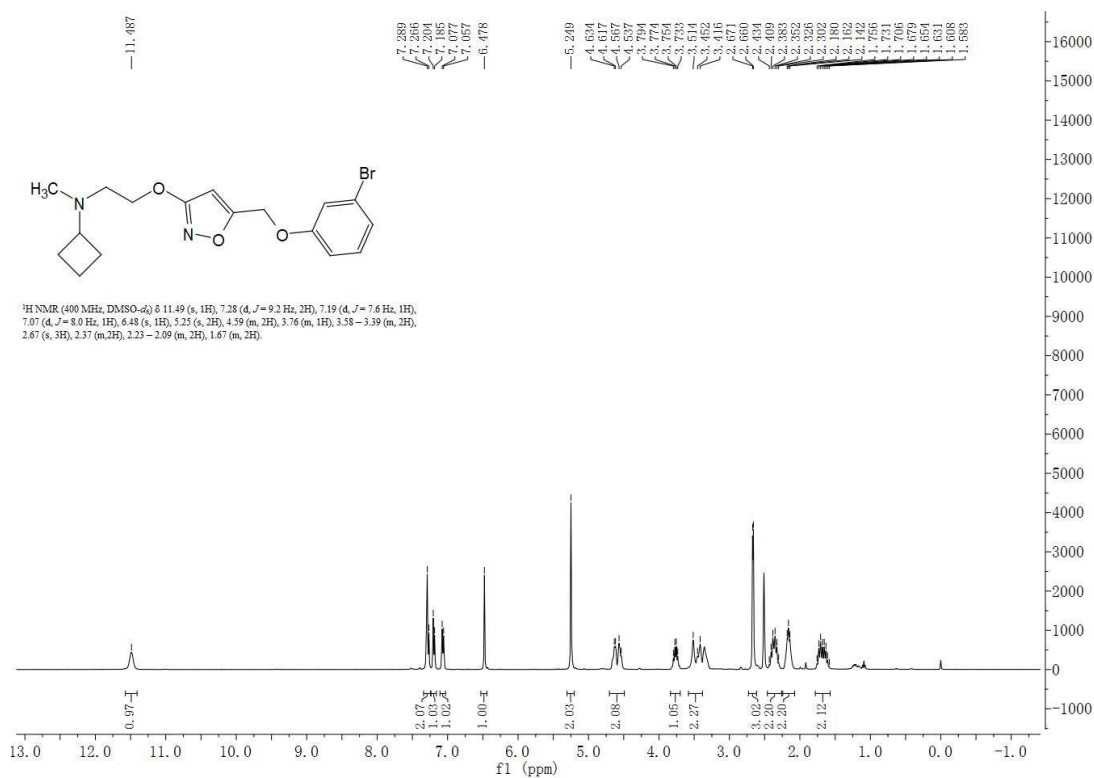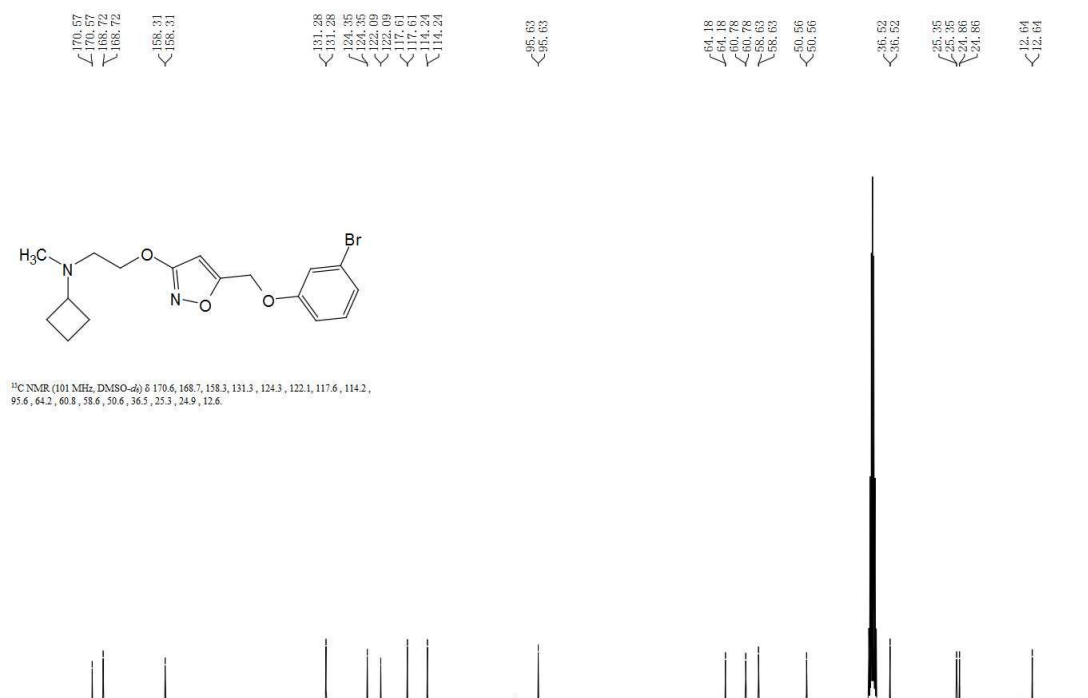

CN(C1CCC1)CCOC2=CC=CC=C2OC3=CC=CC=C3Br

<sup>1</sup>H NMR (400 MHz, DMSO-*d*<sub>6</sub>) δ 11.28 (br, 1H), 7.47 (d, *J* = 8.4 Hz, 2H), 7.01 (d, *J* = 8.4 Hz, 2H), 6.45 (s, 1H), 5.19 (s, 2H), 4.65–4.48 (m, 2H), 3.74 (m, 1H), 3.42 (m, 2H), 2.65 (s, 3H), 2.42–2.25 (m, 2H), 2.22–2.08 (m, 2H), 1.67 (m, 2H).

11.277  
 7.481  
 7.480  
 7.018  
 6.997  
 6.448  
 5.193  
 5.183  
 4.617  
 4.595  
 4.578  
 4.543  
 4.529  
 4.513  
 4.504  
 3.753  
 3.732  
 3.712  
 3.693  
 3.424  
 2.655  
 2.643  
 2.397  
 2.374  
 2.347  
 2.322  
 2.309  
 2.284  
 2.265  
 2.248  
 2.198  
 1.746  
 1.746  
 1.717  
 1.693  
 1.685  
 1.639  
 1.614  
 1.593

0.97  
 2.28  
 2.28  
 1.00  
 2.25  
 2.20  
 1.07  
 1.72  
 2.15  
 2.24  
 2.19  
 2.15

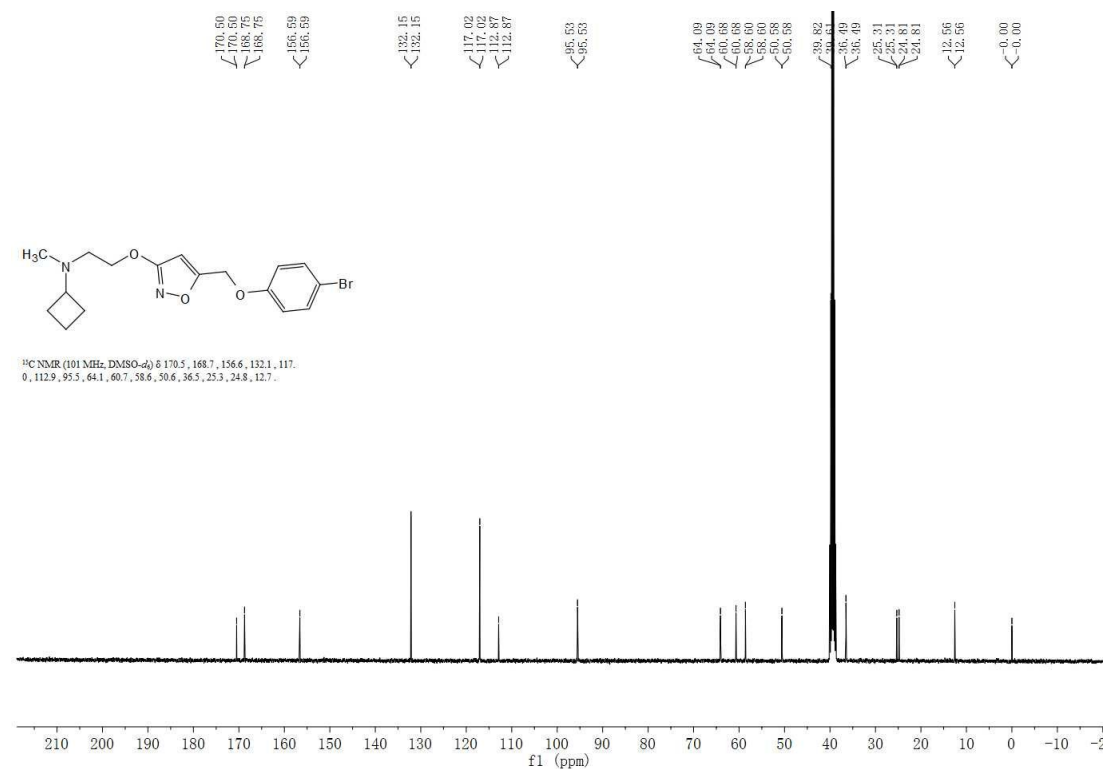

# <sup>1</sup>H NMR and <sup>13</sup>C NMR spectra of compound **21**

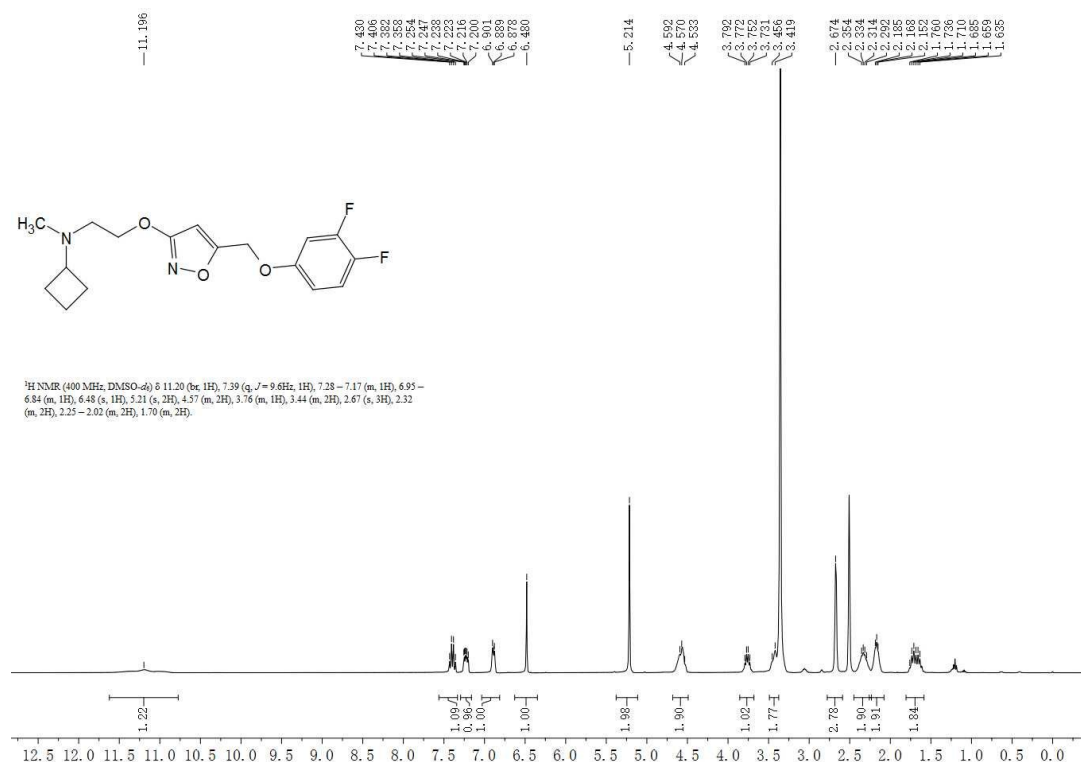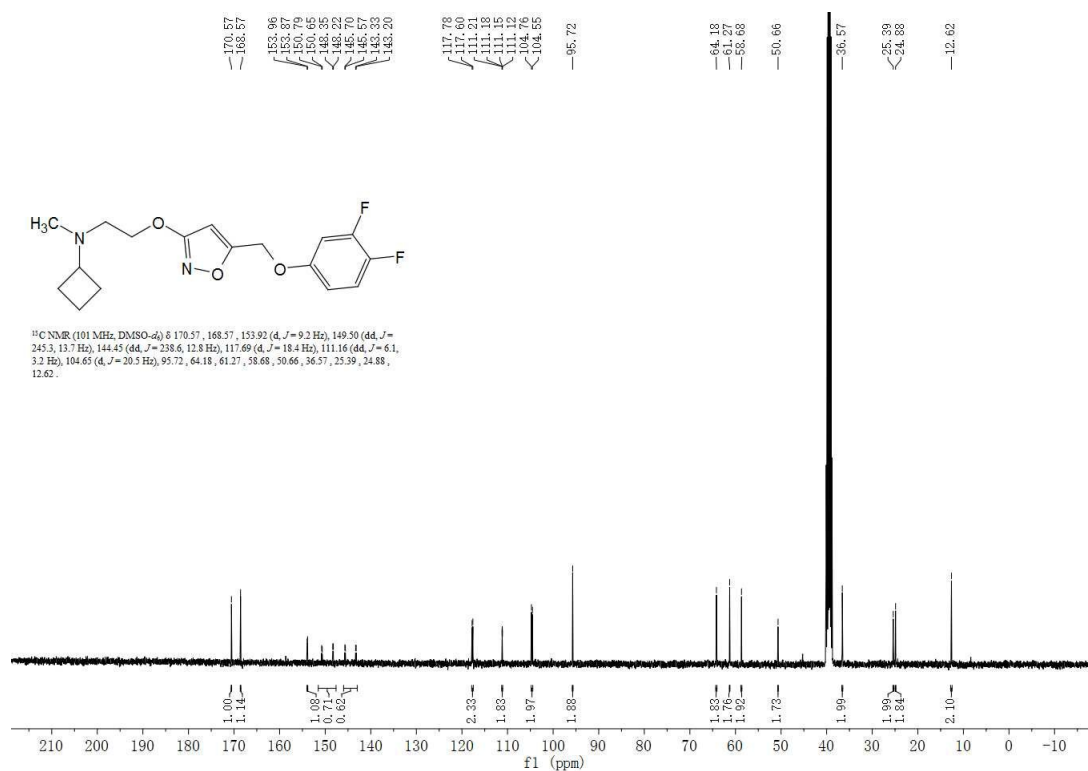

# <sup>1</sup>H NMR and <sup>13</sup>C NMR spectra of compound **22**

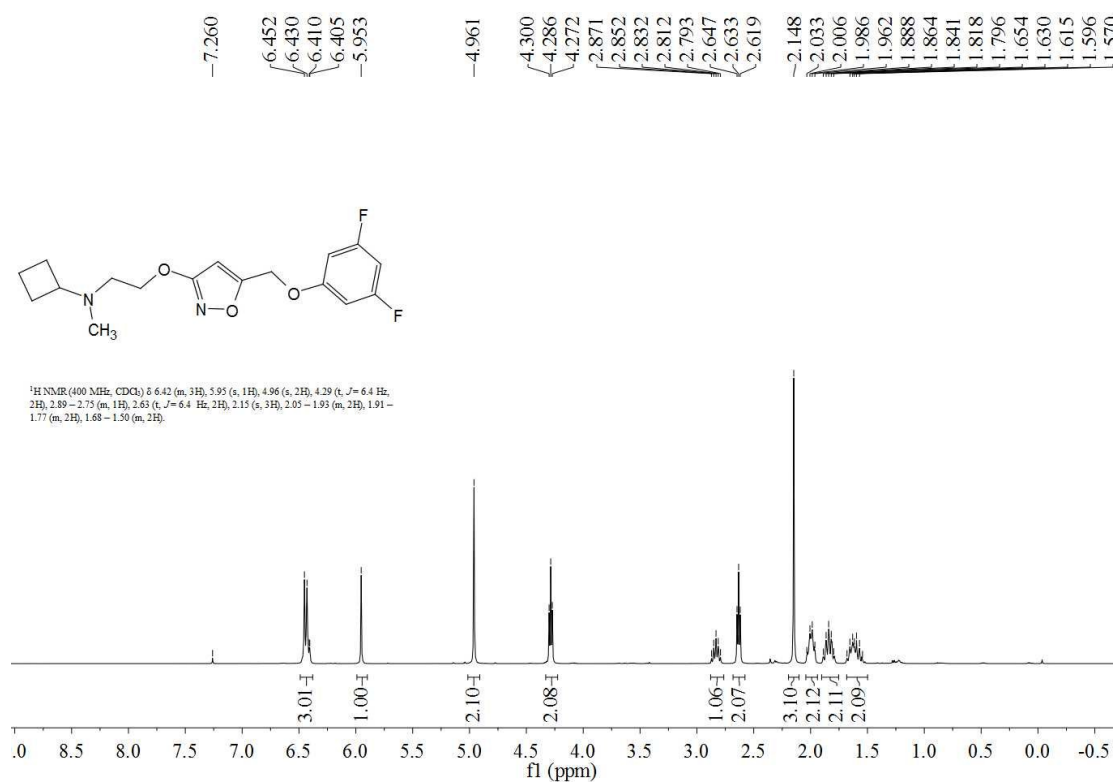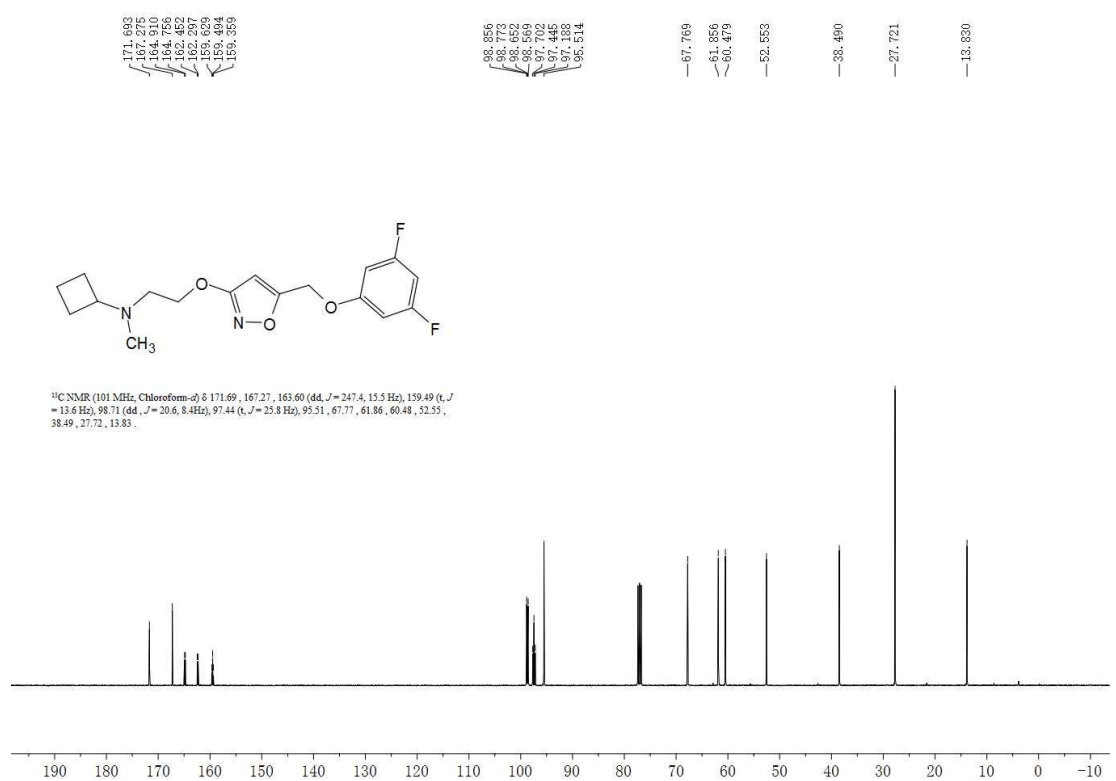

# <sup>1</sup>H NMR and <sup>13</sup>C NMR spectra of compound **23**

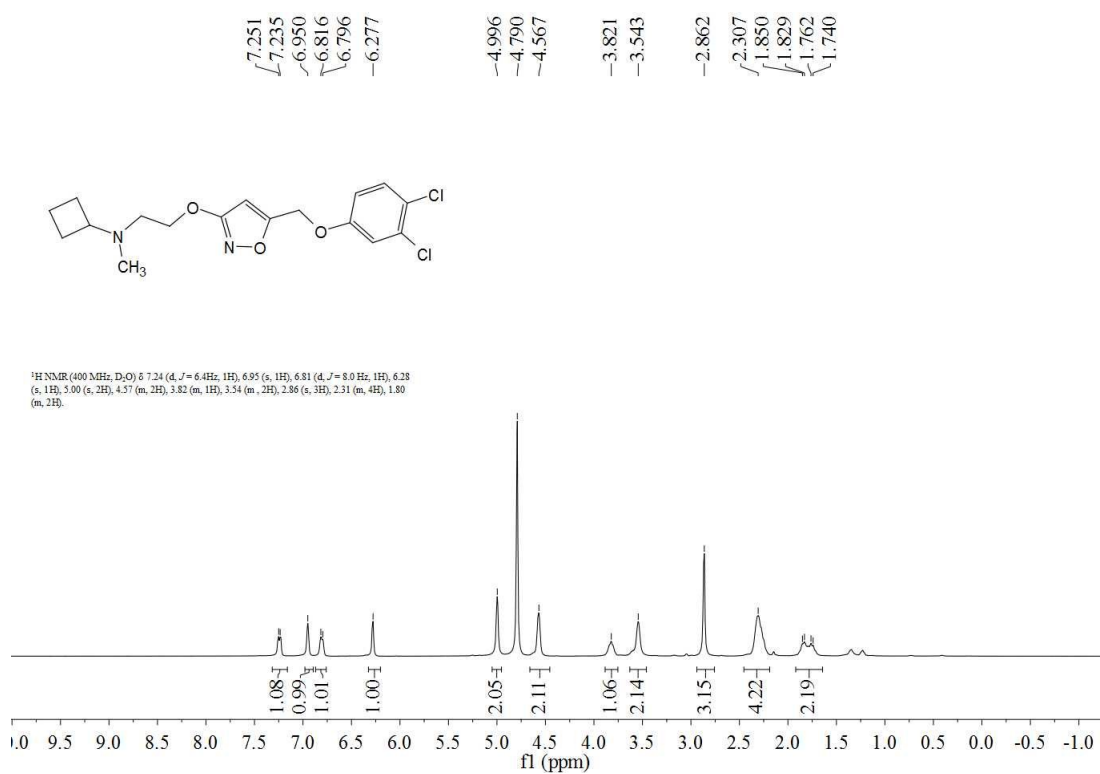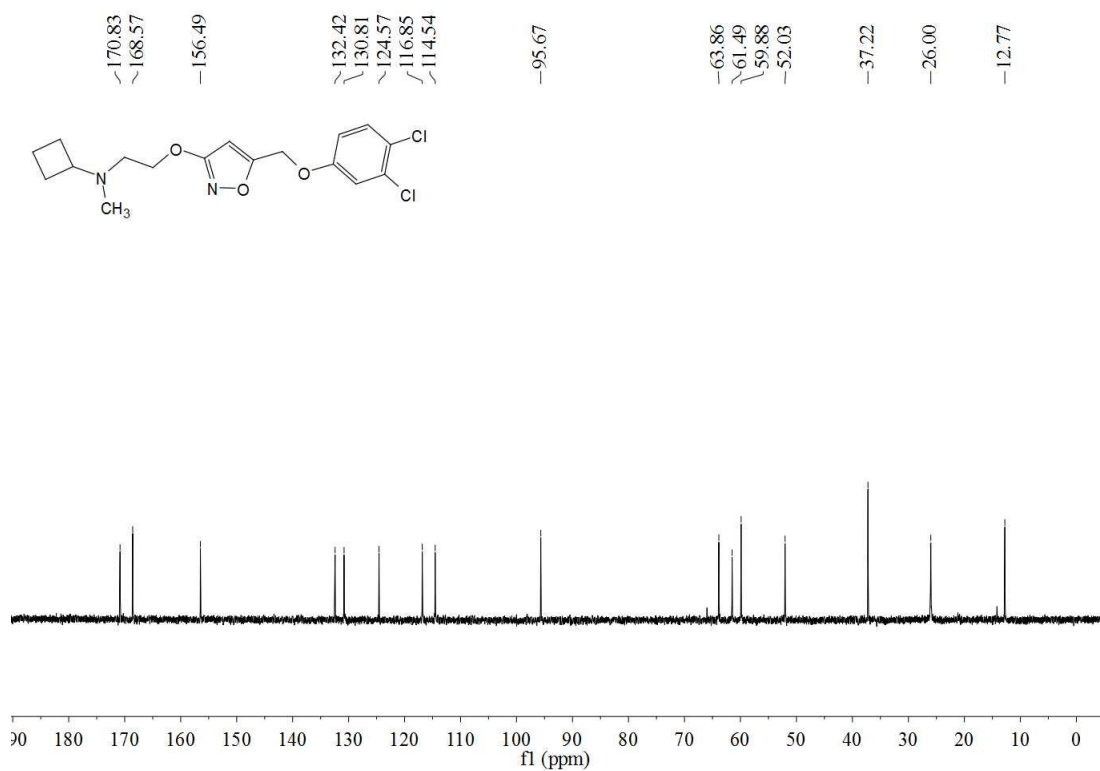

<sup>1</sup>H NMR and <sup>13</sup>C NMR spectra of compound **24**

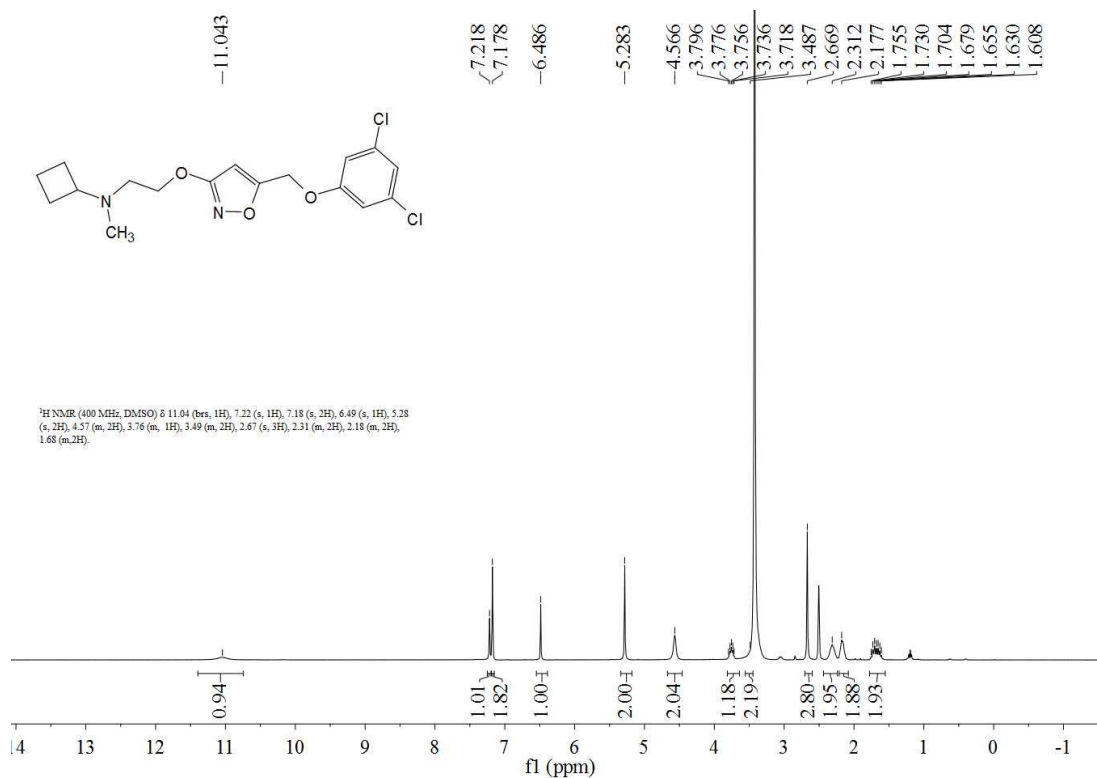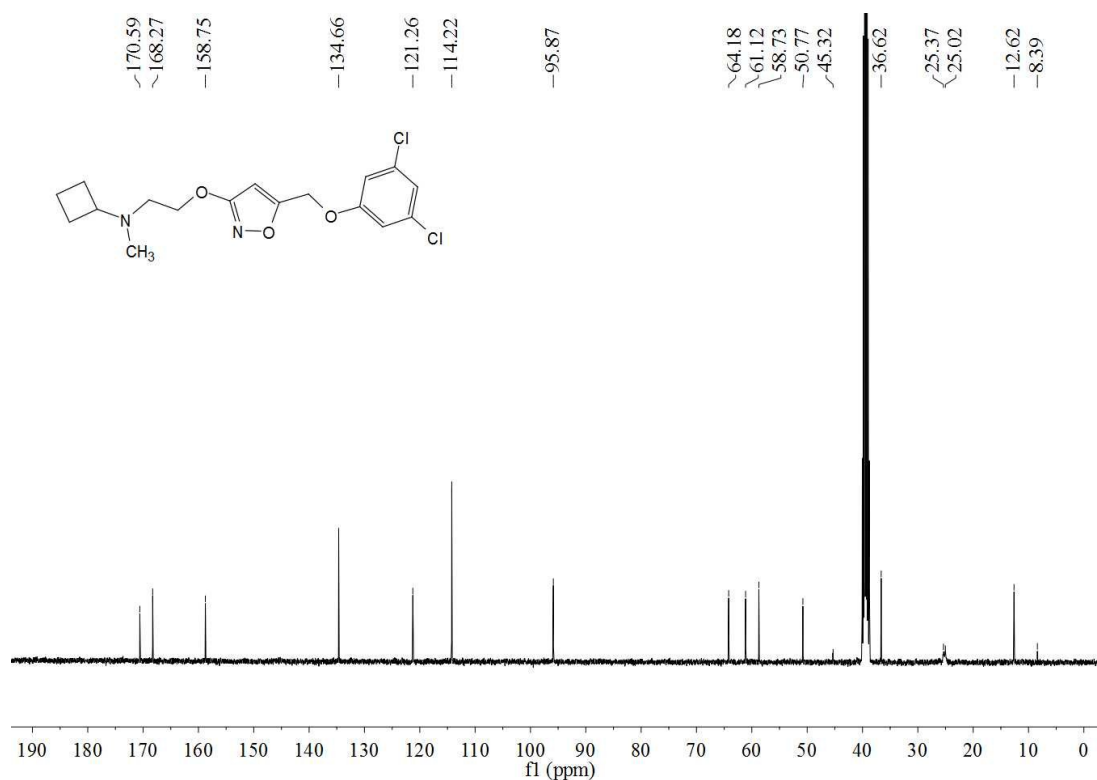

# <sup>1</sup>H NMR and <sup>13</sup>C NMR spectra of compound **25**

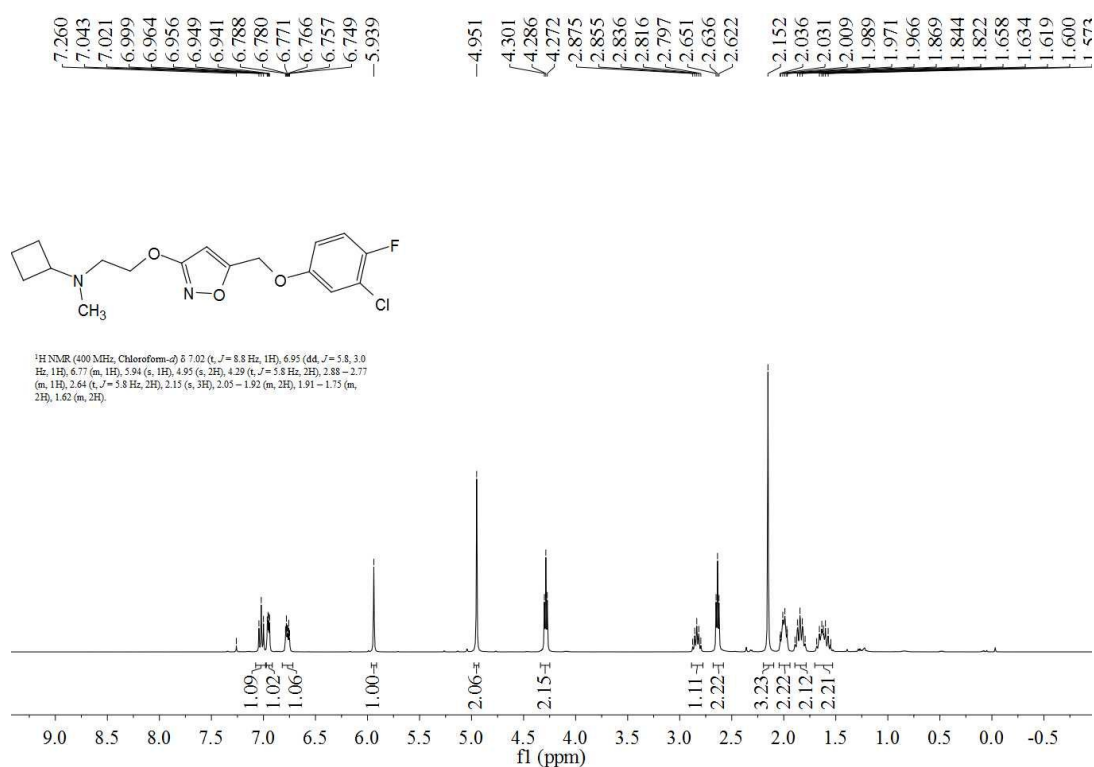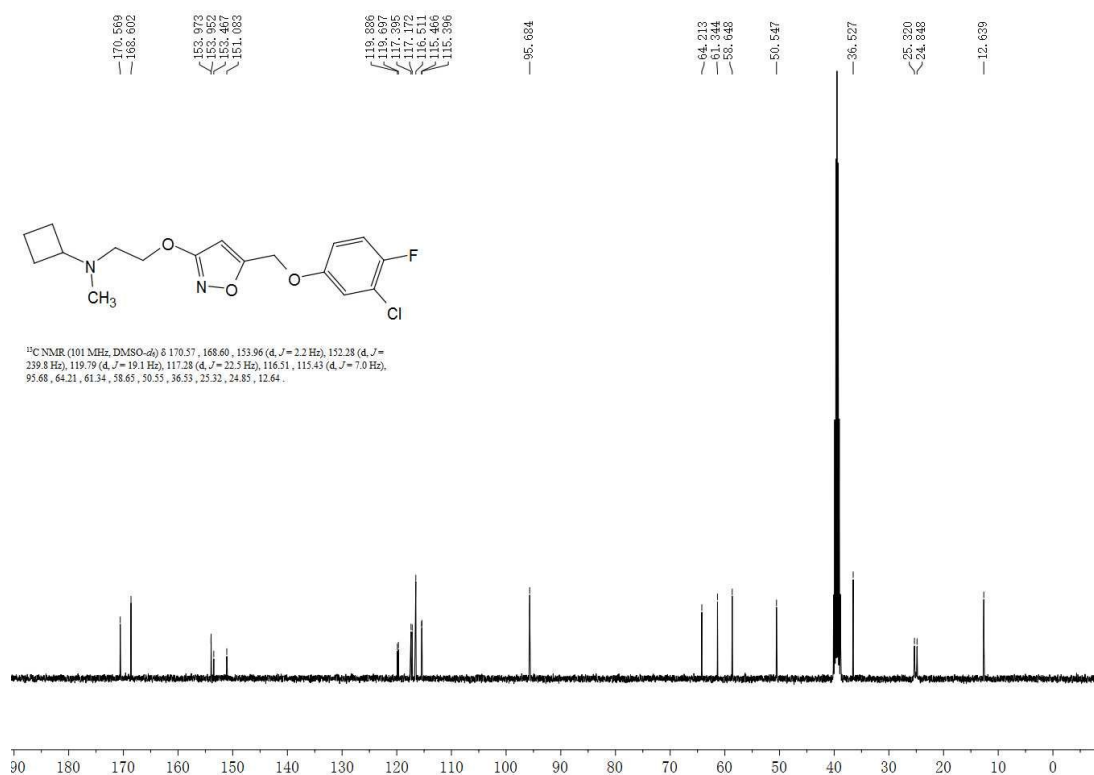

# <sup>1</sup>H NMR and <sup>13</sup>C NMR spectra of compound **26**

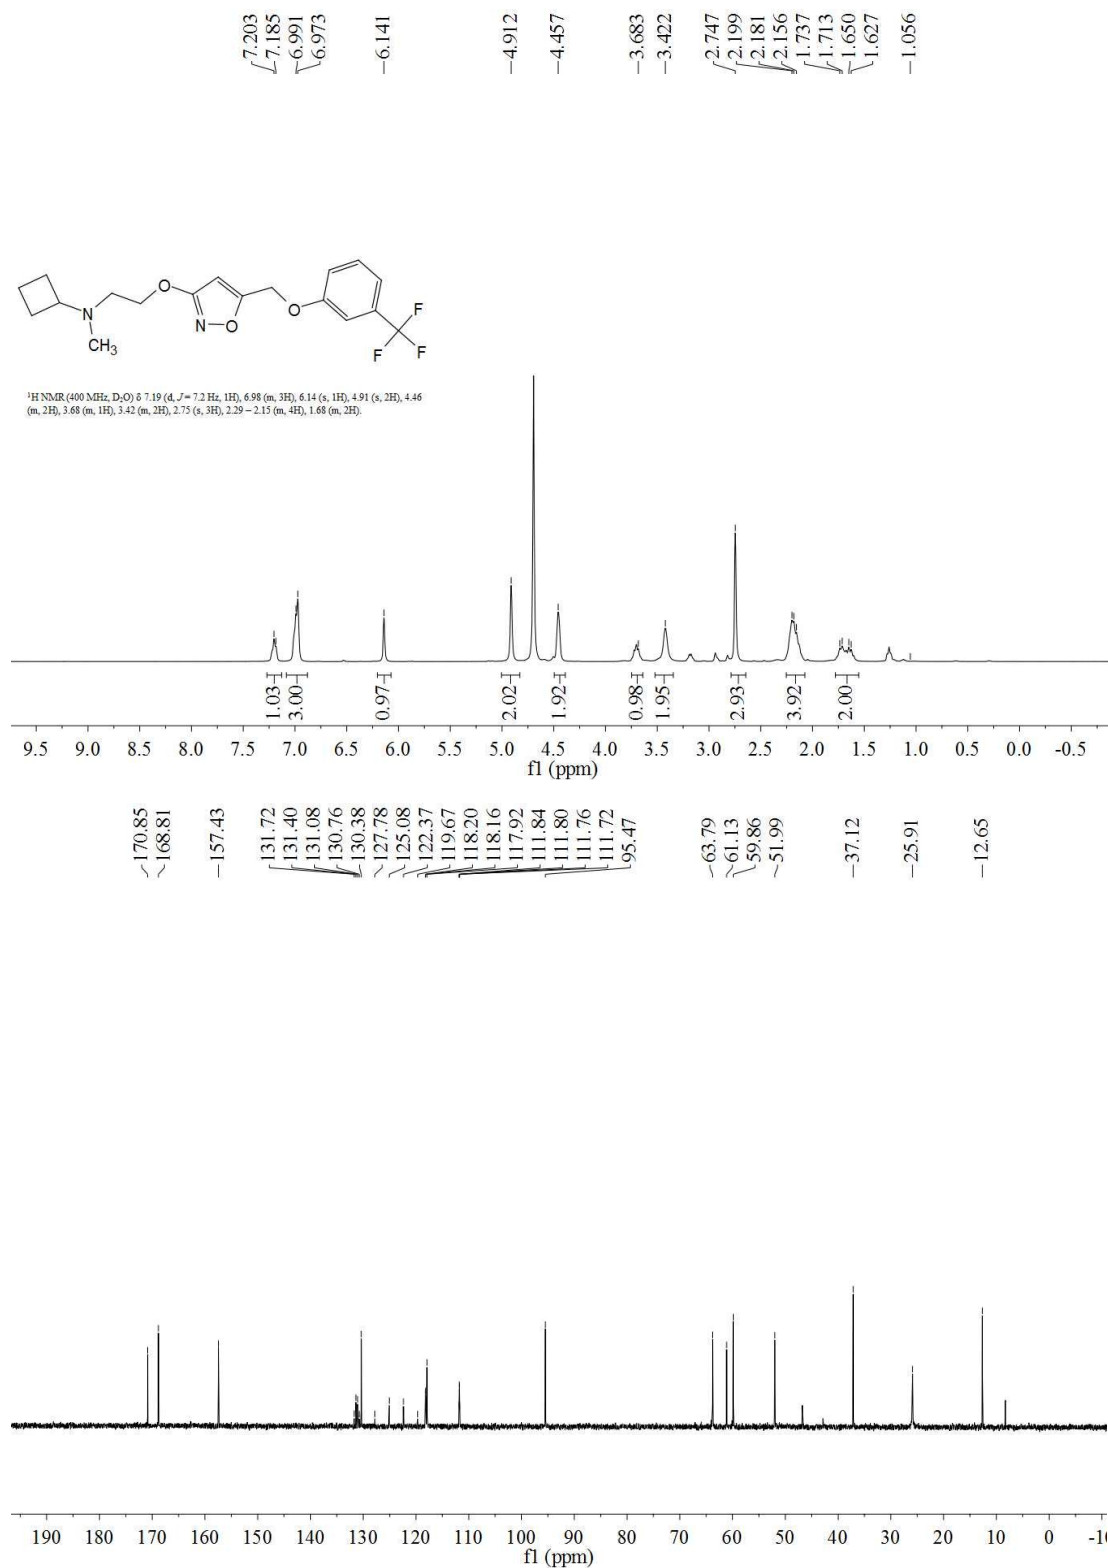

# <sup>1</sup>H NMR and <sup>13</sup>C NMR spectra of compound **27**

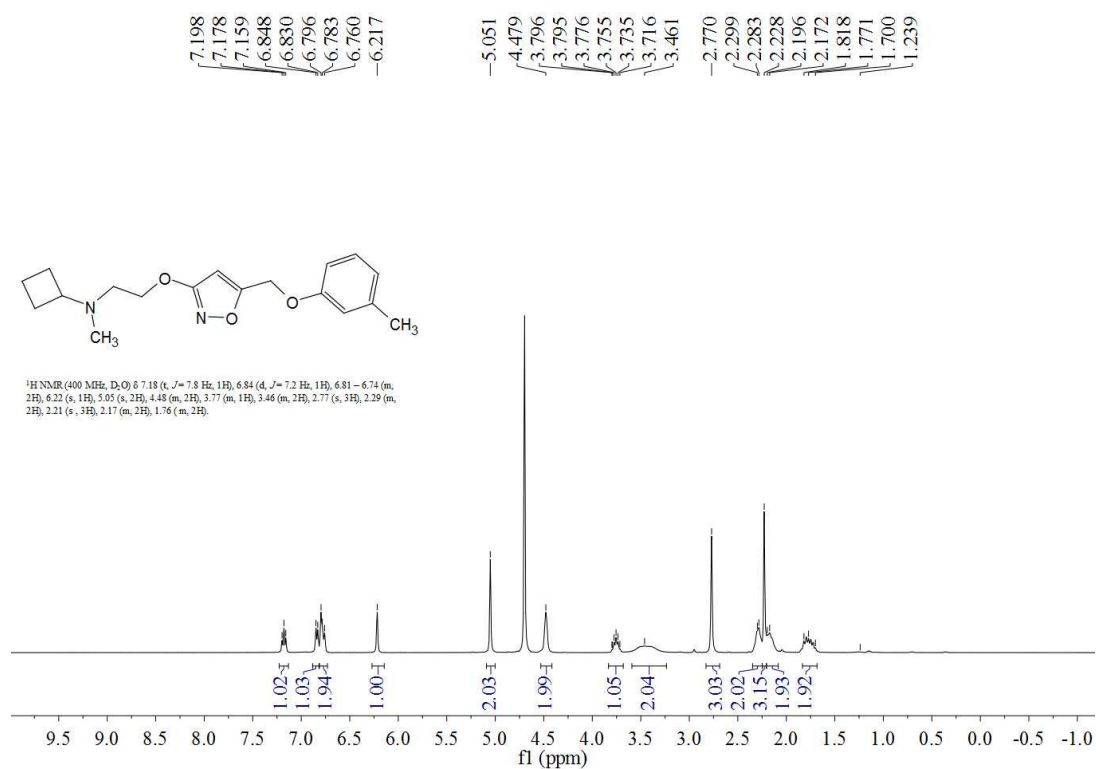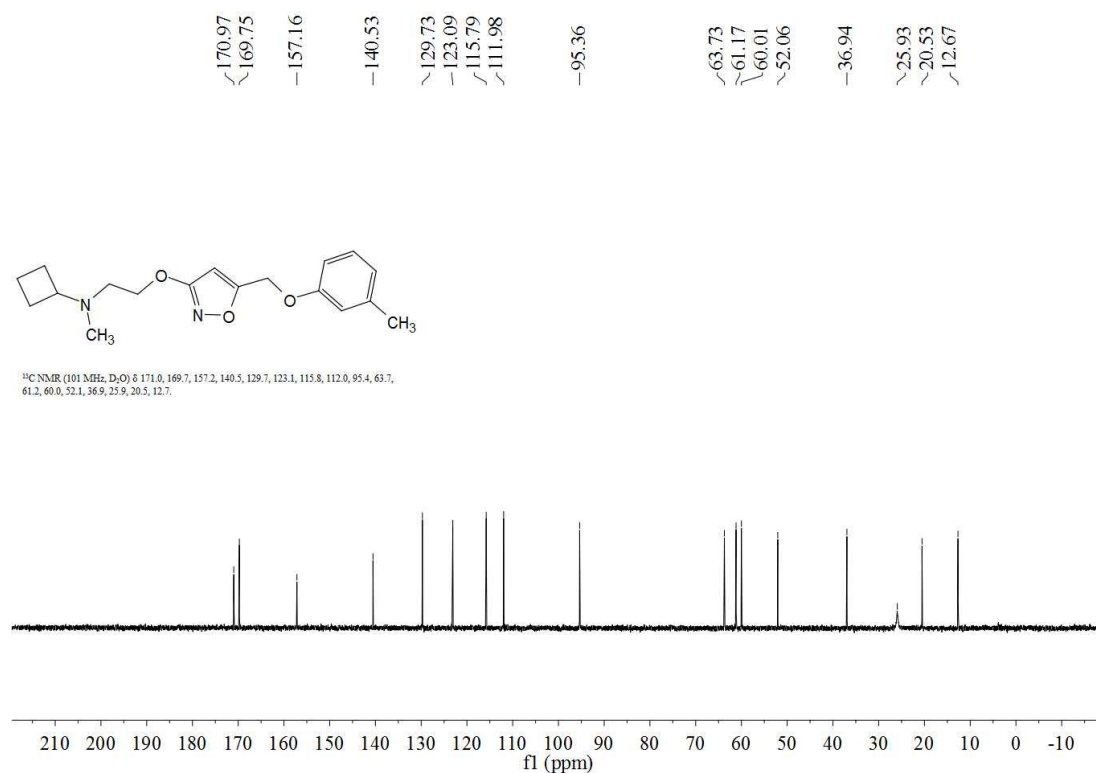

# <sup>1</sup>H NMR and <sup>13</sup>C NMR spectra of compound **28**

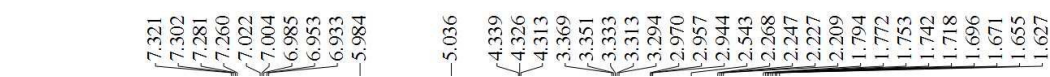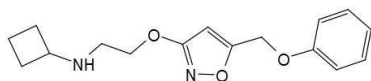

<sup>1</sup>H NMR (400 MHz, CDCl<sub>3</sub>) δ 7.30 (t, *J* = 8.0 Hz, 2H), 7.00 (t, *J* = 7.4 Hz, 1H), 6.94 (d, *J* = 8.0 Hz, 2H), 5.98 (s, 1H), 5.04 (s, 2H), 4.33 (t, *J* = 5.2 Hz, 2H), 3.44–3.26 (m, 1H), 2.96 (t, *J* = 5.2 Hz, 2H), 2.54 (br, 1H), 2.32–2.16 (m, 2H), 1.88–1.51 (m, 4H).

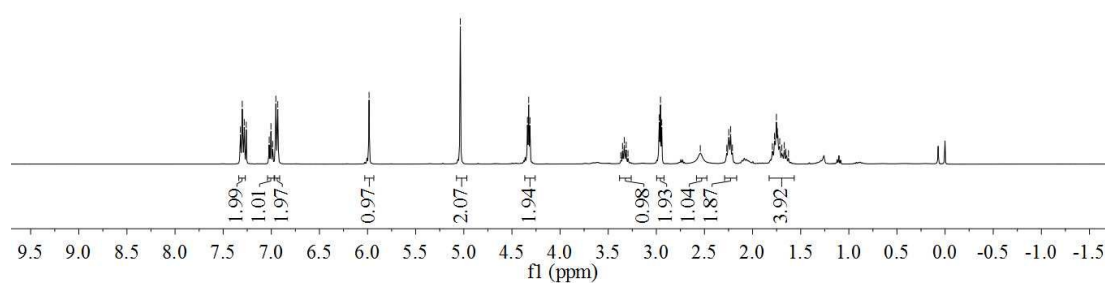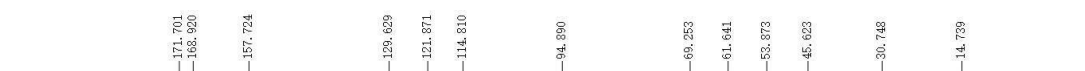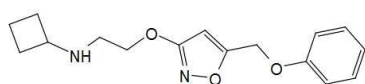

<sup>13</sup>C NMR (101 MHz, Chloroform-*d*) δ 171.70, 168.92, 157.72, 129.63, 121.87, 114.81, 94.89, 69.25, 61.64, 53.87, 45.62, 30.75, 14.74.

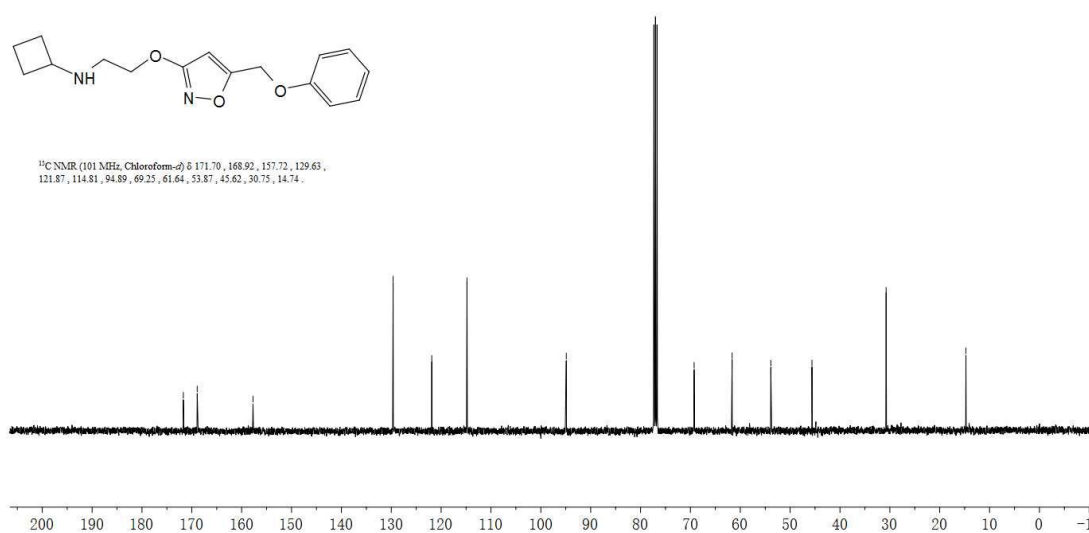

# <sup>1</sup>H NMR and <sup>13</sup>C NMR spectra of compound **29**

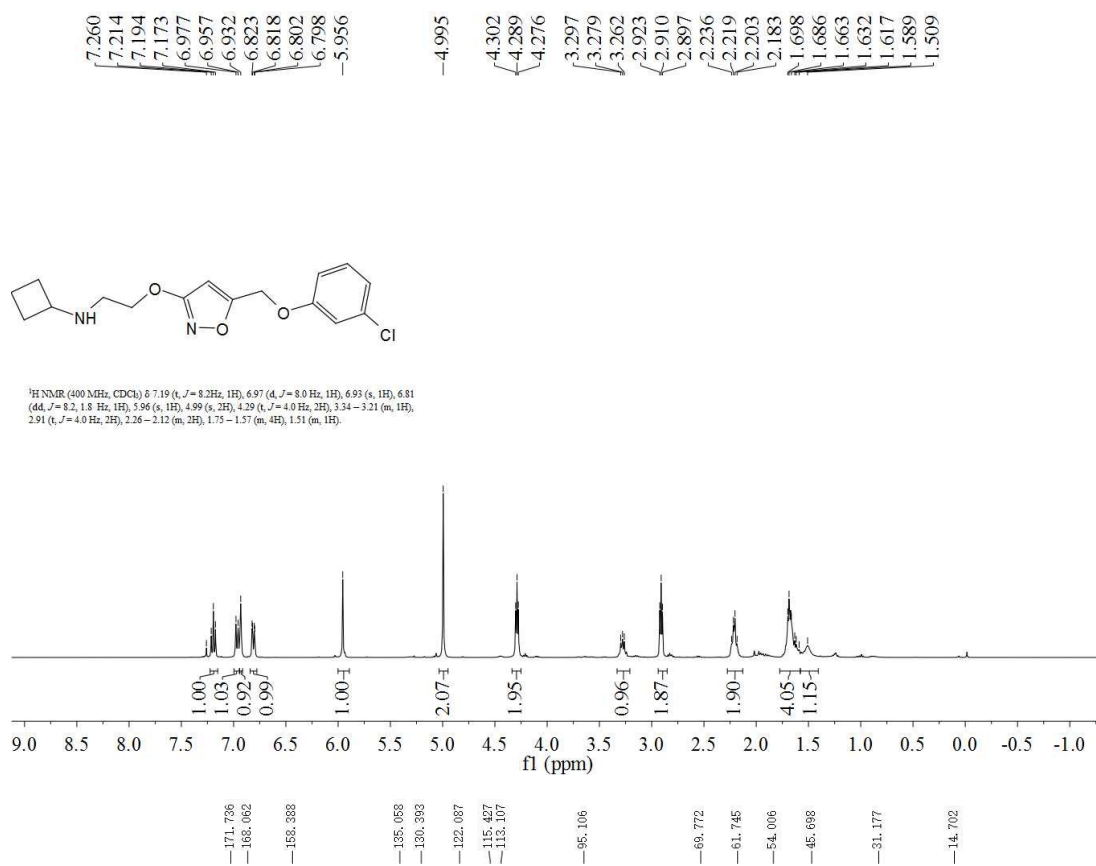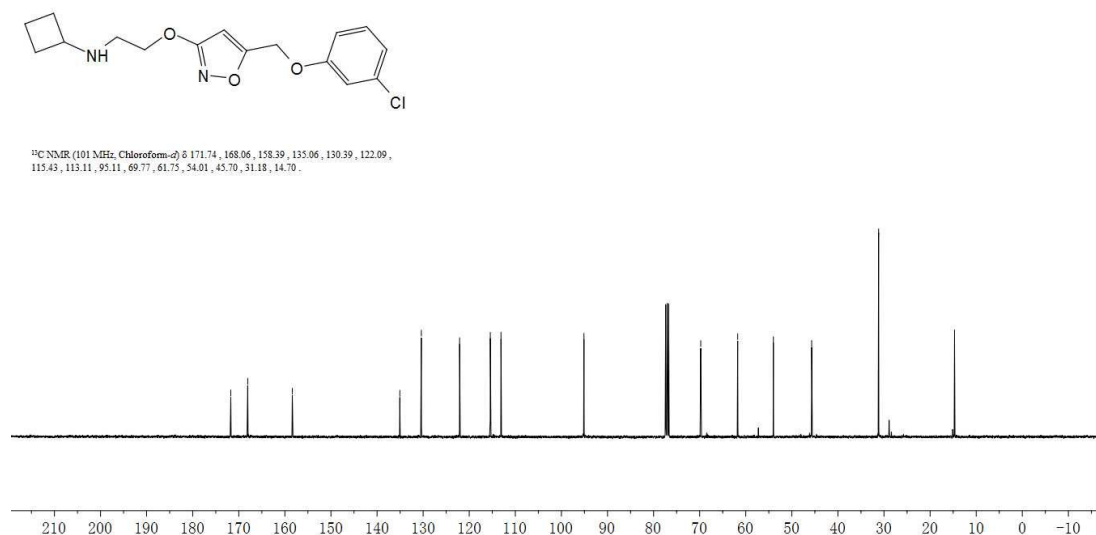

# <sup>1</sup>H NMR and <sup>13</sup>C NMR spectra of compound **30**

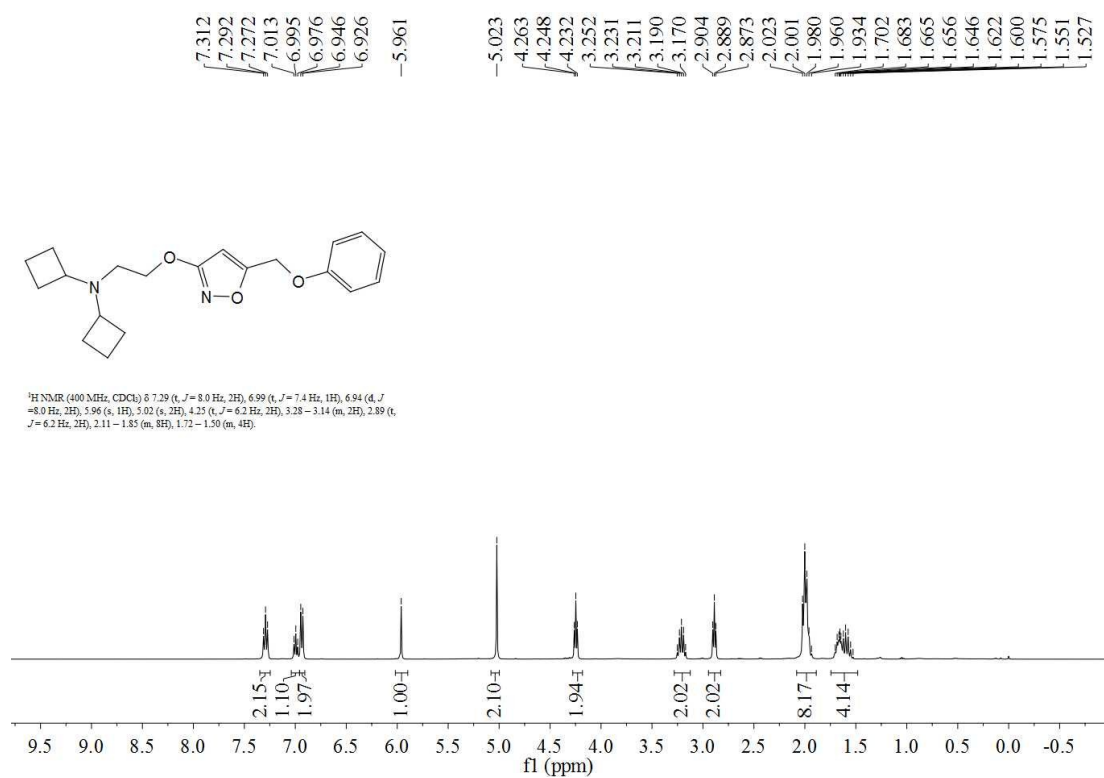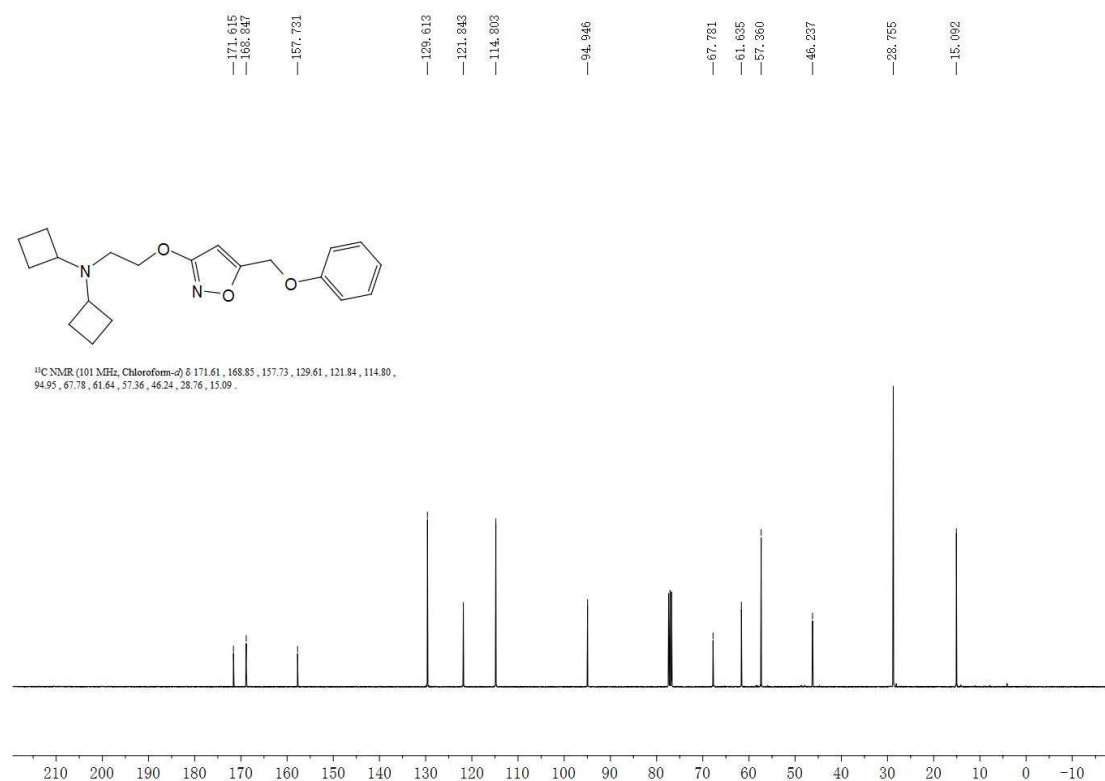

Supplement: c8ra00072g1.pdf [file c8ra00072g1.pdf]
